# Supplementary material for: Self-assembly of a dual functional bioactive peptide amphiphile incorporating both matrix metalloprotease substrate and cell adhesion motifs
Source: Royal Society of Chemistry journal article supplement (doi:10.1039/c5sm00459d), 2015-01-01
Supplement: c5sm00459d1.pdf [file c5sm00459d1.pdf]

## Supporting Information

### Self-Assembly of a Dual Functional Bioactive Peptide Amphiphile Incorporating both Matrix Metalloprotease Substrate and Cell Adhesion Motifs

Ashkan Dehsorkhi,<sup>a</sup> Ricardo M. Gouveia,<sup>b</sup> Andrew M. Smith,<sup>a,d</sup> Ian W. Hamley,<sup>\*a</sup> Valeria Castelletto,<sup>a</sup> Che J. Connon,<sup>b</sup> Mehedi Reza<sup>c</sup> and Janne Ruokolainen<sup>c</sup>

<sup>a</sup>*School of Chemistry, Pharmacy and Food Biosciences, University of Reading, Whiteknights, Reading, RG6 6AD, U.K.*

<sup>b</sup>*Institute of Genetic Medicine, University of Newcastle upon Tyne, International Centre for Life, Central Parkway, Newcastle upon Tyne, NE1 3BZ, U.K.*

<sup>c</sup>*Department of Applied Physics, Aalto University School of Science, P.O. Box 15100 FI-00076 Aalto, Finland*

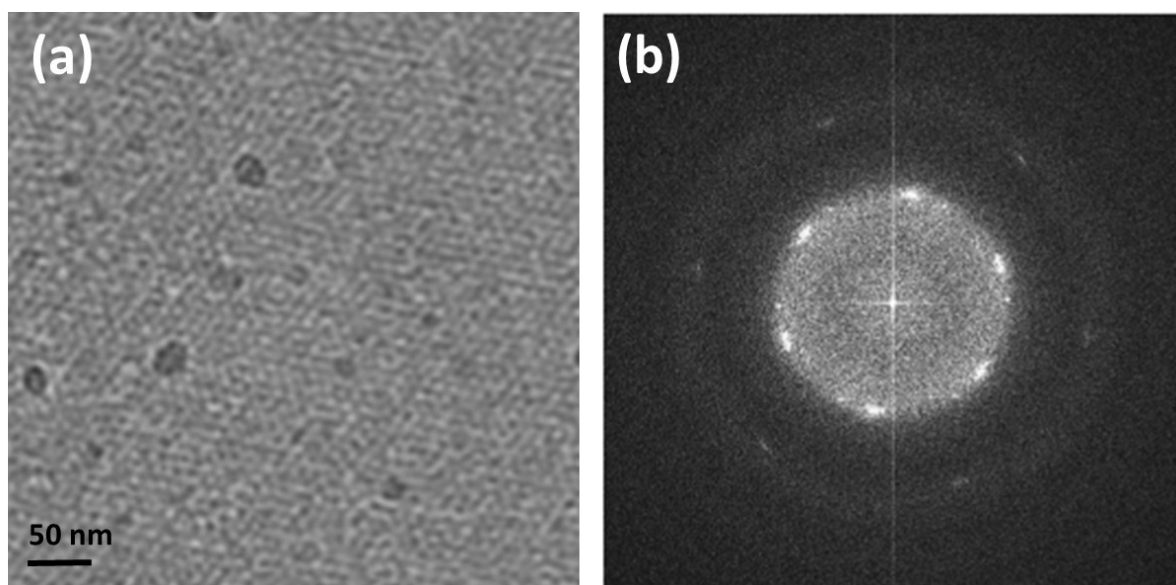

**SI Figure S1.** Cryo-TEM images for a 1 wt% solution of C<sub>16</sub>E-MMPRGDS dissolved in water (a) packing of spherical micelles and (b) hexagonal ordering of micelles with a lattice spacing of 6.7 nm.
